# Supplementary material
Source: PubMed Central journal article supplement (PMC3740892)
Supplement: 1304386110_pnas.201304386SI.pdf [file 1304386110_pnas.201304386SI.pdf]

# Supporting Information

Radchenko et al. 10.1073/pnas.1304386110

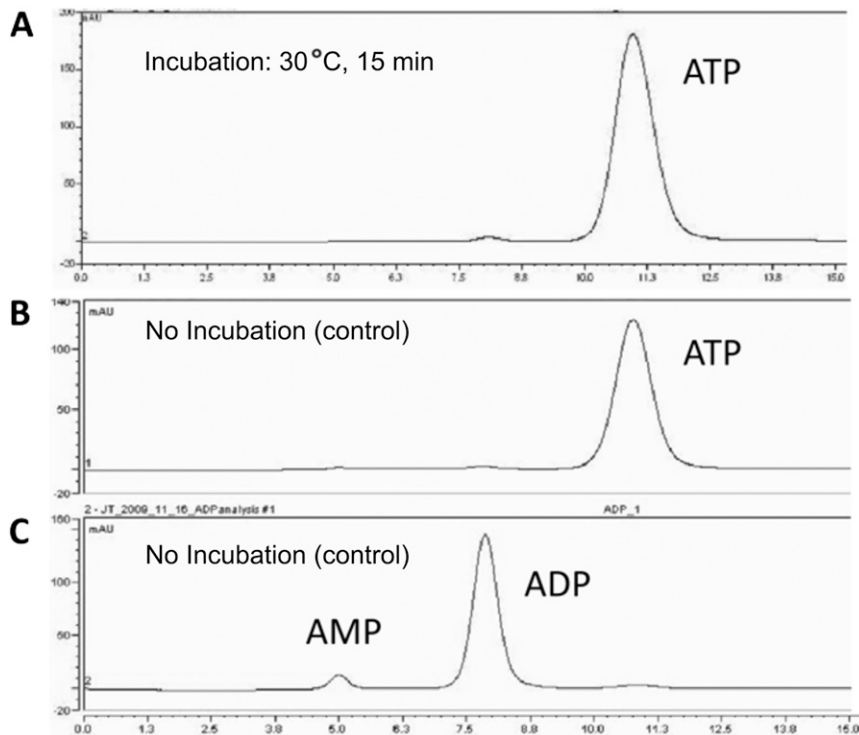

**Fig. S1.** ATP stability at 30 °C. The stability of ATP after incubation at 30 °C for 15 min was assessed by HPLC, as described in *Materials and Methods*. (A) ATP sample after incubation. (B) ATP control (no incubation). (C) ADP control (no incubation), contains significant amounts of AMP.

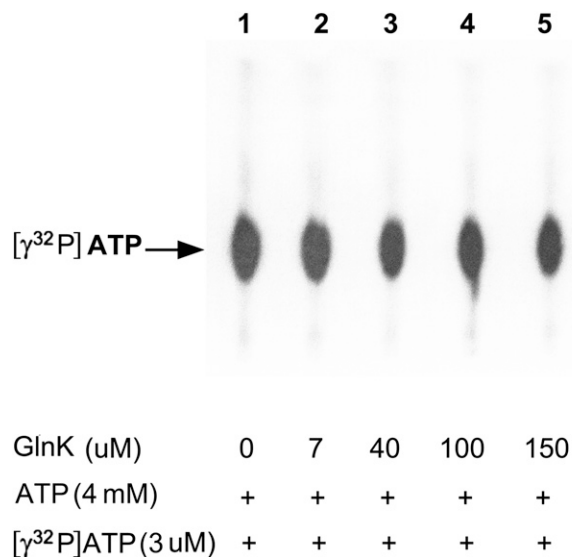

**Fig. S2.** ATPase activity of *E. coli* GlnK, using standard protocol. Analysis of ATP hydrolysis by TLC, using the standard protocol, as described in *Materials and Methods*. Reactions were initiated by the addition of ATP (0.8  $\mu\text{L}$  of 100 mM ATP plus 1  $\mu\text{L}$  [ $\gamma^{32}\text{P}$ ]-ATP; 3000 Ci mmol, Amersham Biosciences). The final ATP concentration in the assay was 4 mM.

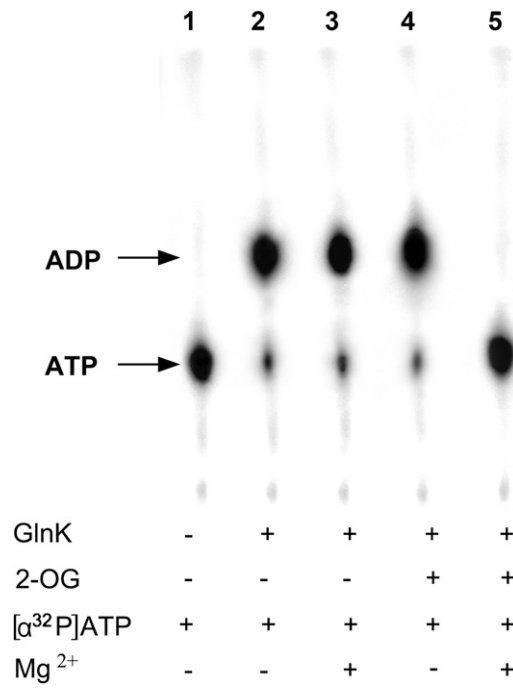

**Fig. S3.** ATPase activity of *E. coli* GlnK. Analysis of ATP hydrolysis, using [α<sup>32</sup>P]-ATP as described in *Materials and Methods*. Components of the assay are listed below the figure. Hydrolysis to ADP is shown in lanes 2–4.

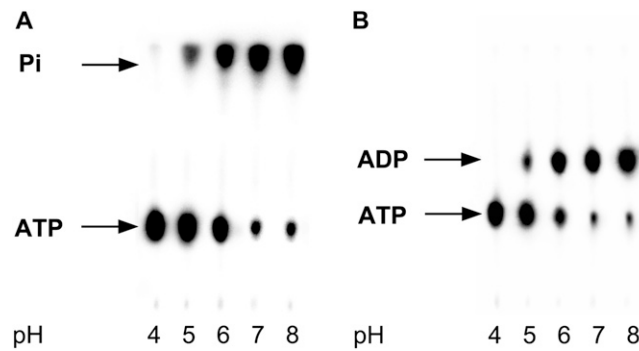

**Fig. S4.** pH dependence of ATP hydrolysis by GlnK. Analysis of ATP hydrolysis by TLC at a range of pH values from 4.0 to 8.0. All assays contained GlnK (100 μM); Mg<sup>2+</sup> (6 mM). (A) using [γ<sup>32</sup>P]-ATP showing release of free Pi. (B) using [α<sup>32</sup>P]-ATP showing production of ADP.
